# Supplementary material for: Dimethyl fumarate attenuates reactive microglia and long-term memory deficits following systemic immune challenge
Source: PubMed Central journal article supplement (PMC5877396; doi:10.1186/s12974-018-1125-5), 2018-03-29
Supplement: 12974_2018_1125_MOESM1_ESM.pdf [file 12974_2018_1125_MOESM1_ESM.pdf]

(A)

MG cultures

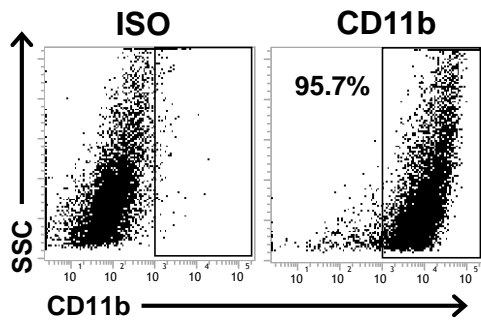

(B)

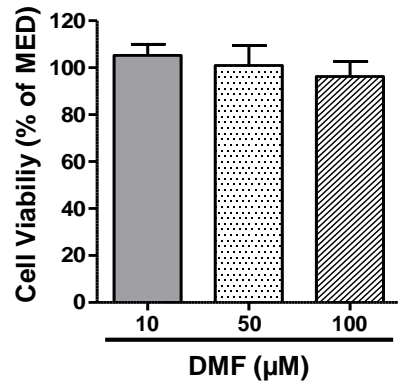

(C)

Enriched astrocyte cultures

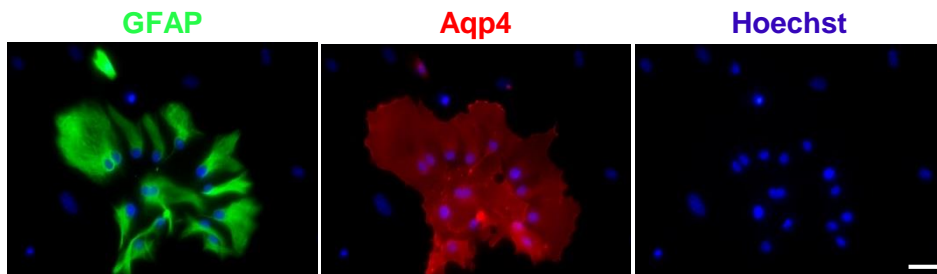

**Figure S1.**

**Characterization of microglial cultures, cell toxicity of DMF, and enriched astrocyte cultures.** (A) Purity of primary microglial cultures. Cells were harvested and analyzed on a flow cytometer to measure cell purity. Representative flow plots show that over 95% of cells express the microglial marker, CD11b. ISO, the isotype control antibody. (B) Microglial cells were incubated with DMF at different concentrations (0, 10, 50, or 100  $\mu$ M) for 24h. The viability of microglial cells was examined by MTT assay. Data presented are from three independent experiments. No statistical significance was found when data were analyzed by one-way ANOVA with Bonferroni's post hoc multiple comparison test. (C) Immunocytochemical detection of GFAP (green)- and Aqp4 (red)-stained cells from enriched astrocyte cultures. Cell nuclei were stained blue with Hoechst 33342. Representative images are from three independent experiments. Scale bar, 40  $\mu$ m.
