# Supplementary material for: Dimethyl fumarate attenuates reactive microglia and long-term memory deficits following systemic immune challenge
Source: PubMed Central journal article supplement (PMC5877396; doi:10.1186/s12974-018-1125-5), 2018-03-29
Supplement: 12974_2018_1125_MOESM2_ESM.pdf [file 12974_2018_1125_MOESM2_ESM.pdf]

(A)

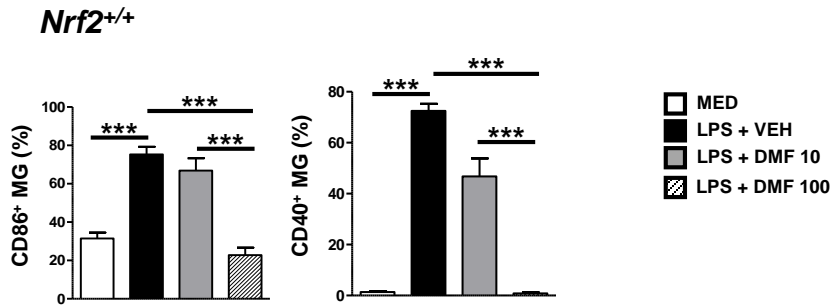

(B)

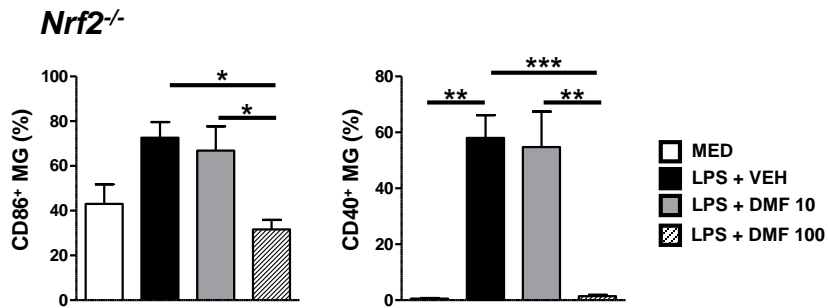

(C)

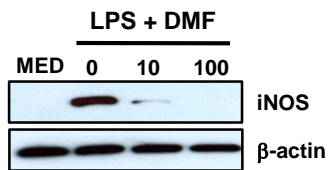

## Figure S2.

### Inflammatory activation of MG induced by LPS.

(A) The percentage of CD86<sup>+</sup> and CD40<sup>+</sup> cells in *Nrf2*<sup>+/+</sup> MG was measured in each treatment group. Data presented are from five independent experiments. \*\*\**p* < 0.001 by one-way ANOVA with Bonferroni's post hoc multiple comparison test. MED, cell culture medium. (B) The percentage of CD86<sup>+</sup> and CD40<sup>+</sup> cells in *Nrf2*<sup>-/-</sup> MG was measured in each treatment group. Data presented are from three independent experiments. \**p* < 0.05, \*\**p* < 0.01, \*\*\**p* < 0.001 by one-way ANOVA with Bonferroni's post hoc multiple comparison test. (C) Representative western blot analysis shows that iNOS protein levels were upregulated by LPS (1 μg/ml) stimulation in MG. The cell lysates were prepared immediately following CM collected. DMF treatment suppressed iNOS protein induced by LPS stimulation in MG. Results are from three independent experiments.
